# Supplementary material for: Identification of a capsular variant and characterization of capsular acetylation in Klebsiella pneumoniae PLA-associated type K57
Source: PubMed Central journal article supplement (PMC4994043; doi:10.1038/srep31946), 2016-08-23
Supplement: srep31946-s1.pdf [file srep31946-s1.pdf]

## Supplementary information

### SREP-16-10568A

**Title:** Identification of a capsular variant and characterization of capsular acetylation in *Klebsiella pneumoniae* PLA-associated type K57

**Authors:** Chun-Ru Hsu, Chun-Hsing Liao, Tzu-Lung Lin, Han-Ru Yang, Feng-Ling Yang, Pei-Fang Hsieh, Shih-Hsiung Wu, Jin-Town Wang

**Figure S1**

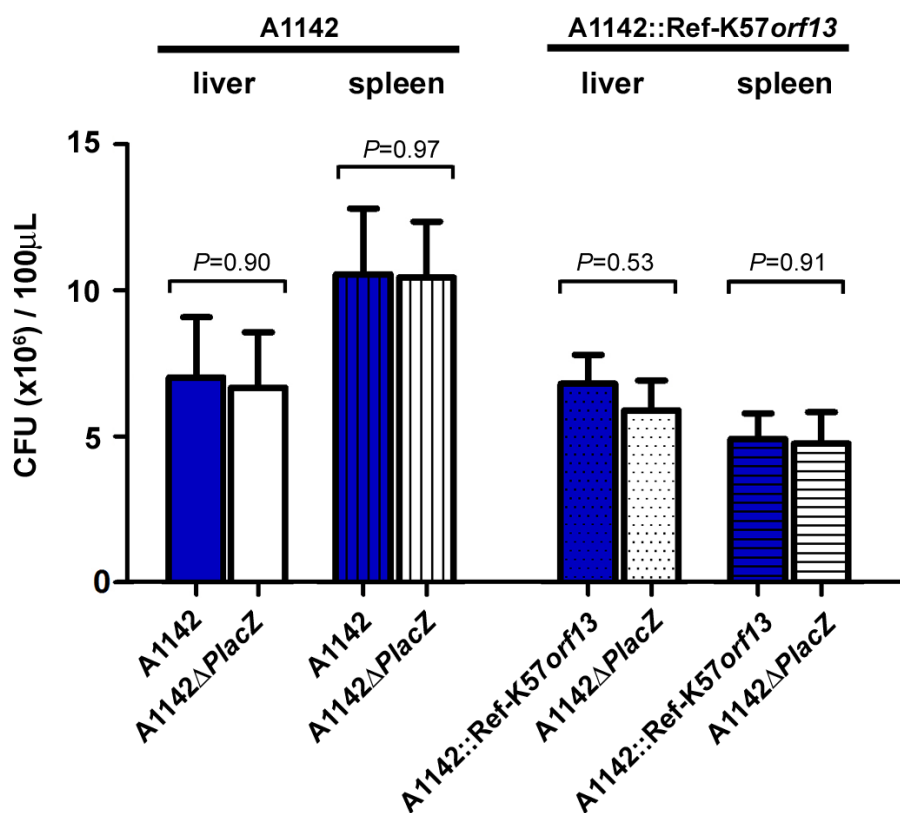

**Figure S1. CFU counts in the *in vivo* competition assays.**

*In vivo* virulence of the A1142 parent strain and acetylation complementation strain

(A1142::Ref-K57orf13) was tested in mice. Each LacZ-positive test strain was mixed with the isogenic lacZ promoter deletion mutant (A1142ΔplacZ) at a 1:1 ratio and inoculated into mice.

Bacterial colonies in the contents of the liver or spleen of each mouse were recovered 24 h

post-inoculation on LB plates containing IPTG and X-Gal. The number of LacZ-positive (blue) to

LacZ-negative (white) colonies was counted and compared. Data are mean ± SEM from eight mice.

**Figure S2**

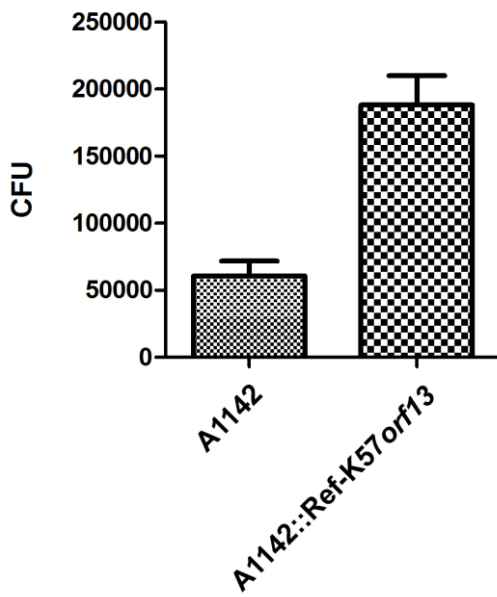

**Figure S2. CFU counts in the adhesion assays.**

Mid-log-phase *K. pneumoniae* (as indicated) was incubated with  $5 \times 10^5$  Caco-2 cells at a MOI of 50 (inoculum) for 15 min, followed by a HBSS wash, Triton X-100 lysis and plating cell-adherent bacteria on LB agar. The results are expressed in the total recovered cell-adherent CFUs without normalization with the inoculum CFUs. Data are presented as mean  $\pm$  SEM from three independent experiments. For A1142 and A1142::Ref-K57orf13,  $P < 0.05$ , Student's t test.

**Table S1.** Specific primers used for RT-qPCR analysis.

| Name      | Sequence (5'-3')          | Purpose in this study         | References or source |
|-----------|---------------------------|-------------------------------|----------------------|
| fimA-218F | TCGATCAAACCGTTCAGTTAGG    | Real-time PCR for <i>fimA</i> | This study           |
| fimA-330R | ACCGTAGTGTGCGCAATCATC     | Real-time PCR for <i>fimA</i> | This study           |
| fimC-21F  | TGTGAGAAAAACGGCAACGA      | Real-time PCR for <i>fimC</i> | 49                   |
| fimC-83R  | CTGGCGGCGAAAAGCA          | Real-time PCR for <i>fimC</i> | 49                   |
| mrkD-344F | TCGTCTATCCCGACGTCTTT      | Real-time PCR for <i>mrkD</i> | This study           |
| mrkD-493R | CCAGTCGTAGGAGGTGTACTTA    | Real-time PCR for <i>mrkD</i> | This study           |
| KP-23-F   | GGTTAAGCGACTAAGCGTACACGGT | Real-time PCR for 23S rRNA    | 49                   |
| KP-23-R   | ACGAGGCGCTACCTAAATAGCTTTC | Real-time PCR for 23S rRNA    | 49                   |
